# Supplementary material for: A monolithic three-dimensional macroporous graphene anode with low cost for high performance microbial fuel cells
Source: Royal Society of Chemistry journal article supplement (doi:10.1039/c5ra24718g), 2016-01-01
Supplement: c5ra24718g1.pdf [file c5ra24718g1.pdf]

## Supporting Information

### A monolithic three-dimensional macroporous graphene anode with low cost for high performance of microbial fuel cell

Lihua Huang,<sup>1,2,3,4</sup> Xiufen Li,<sup>1,3,4,\*</sup> Yueping Ren,<sup>1,3,4</sup> and Xinhua Wang<sup>1,3,4</sup>

<sup>1</sup>Laboratory of Environmental Biotechnology, School of Environmental and Civil Engineering, Jiangnan University, Wuxi 214122, PR China

<sup>2</sup>School of Life Science, Linyi University, Linyi 276005, PR China

<sup>3</sup>Jiangsu Key Laboratory of Anaerobic Biotechnology, Wuxi 214122, PR China

<sup>4</sup>Jiangsu Cooperative Innovation Center of Technology and Material of Water Treatment, Suzhou 215009, PR China

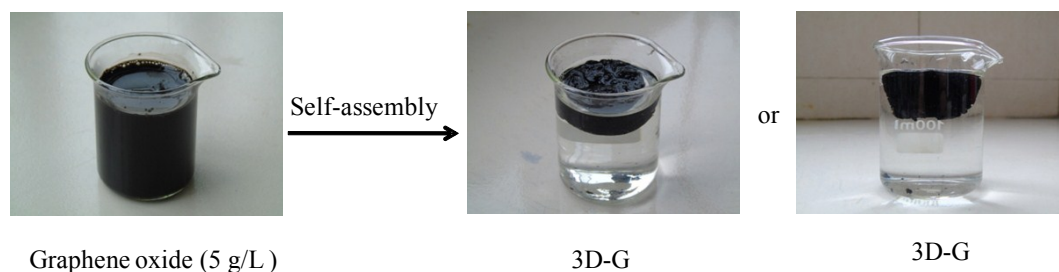

Scheme. S1. The schematic diagram of self-assembly process.

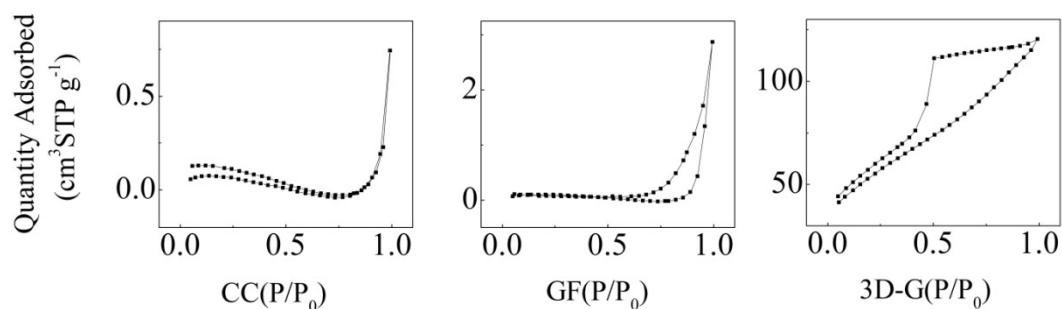

Fig. S1. Nitrogen adsorption-desorption isotherms of the bare anodes.

\*Address correspondence to Professor Xiufen Li, Laboratory of Environmental Biotechnology, School of Environmental and Civil Engineering, Jiangnan University, Wuxi 214122, China.

E-mail: xfli@jiangnan.edu.cn. Tel.: +86 510 85326516. (X. Li)

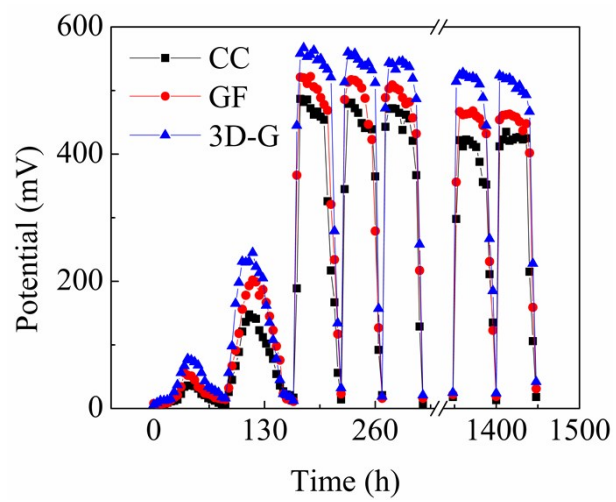

Fig. S2. Profiles of the outputted voltages over time.
